# Supplementary material
Source: publisher site journal article supplement (https://www.dovepress.com/article/607214)
Supplement: Supplementary file 1 [file 607214%20Revised%20Supplementary%20Tables.docx]

**Supplementary Table 1.** Univariable and Multivariable Cox proportional hazard analysis for the primary endpoint

| **Variables** | **Univariate analysis** | | **Multivariate analysis** | |
| --- | --- | --- | --- | --- |
| **HR** | **95% CI** | **HR** | **95% CI** |
| DAPT duration | 0.33 | 0.21-0.51 | 0.35 | 0.22-0.54 |
| Age | 1.06 | 1.04-1.08 | 1.05 | 1.03-1.08 |
| Male | 1.19 | 0.70-2.03 | 1.75 | 1.00-3.04 |
| BMI | 0.94 | 0.88-1.01 | 0.96 | 0.90-1.03 |
| Current smoker | 0.98 | 0.63-1.51 |  |  |
| Diabetes | 1.36 | 0.87-2.12 | 1.34 | 0.85-2.11 |
| Dyslipidemia | 0.98 | 0.62-1.55 | 0.95 | 0.59-1.52 |
| Hypertension | 1.87 | 1.10-3.19 | 1.96 | 1.11-3.45 |
| CKD | 2.69 | 1.30-5.58 | 1.04 | 0.45-2.40 |
| Previous MI | 1.65 | 1.00-2.73 | 1.32 | 0.77-2.26 |
| LM/multi-vessel | 0.81 | 0.49-1.33 |  |  |
| LVEF | 0.97 | 0.94-1.00 | 0.98 | 0.95-1.01 |
| Hemoglobin | 1.00 | 0.98-1.01 |  |  |
| Platelet count | 1.00 | 1.00-1.00 |  |  |
| WBC | 1.07 | 0.94-1.21 |  |  |
| TnI | 1.01 | 0.77-1.34 |  |  |
| Scr | 1.01 | 1.00-1.02 |  |  |
| HDL | 1.30 | 0.57-2.97 |  |  |
| Lp(a) | 1.00 | 0.99-1.01 |  |  |
| HbA1c | 1.00 | 0.85-1.18 |  |  |
| LDL | 0.78 | 0.60-1.01 |  |  |
| β blocker | 0.78 | 0.39-1.55 |  |  |

**Abbreviations**: CKD, chronic kidney disease; MI, myocardial infarction; LM, left main disease; LVEF, left ventricular ejection fraction; WBC, white blood cell; TnI, Cardiac troponin I; Scr, serum creatinine; HDL, high-density lipoprotein; Lp(a), lipoprotein(a); LDL, low-density lipoprotein.

**Supplementary table 2.** Adjusted hazard ratios for clinical outcomes according to hs-CRP tertiles in patients with elevated inflammatory status (prolonged DAPT vs conventional DAPT)

| **Endpoint** | **hsCRP tertile** | **N** | **Events, n** | **Adjusted HR (95% CI)** | **P value** |
| --- | --- | --- | --- | --- | --- |
| **MACCE** | T1 (≤3.12) | 1170 | 26 | 0.282 (0.128–0.621) | 0.0017 |
|  | T2 (3.12–6.69) | 1170 | 30 | 0.491 (0.234–1.032) | 0.0606 |
|  | T3 (≥6.69) | 1170 | 26 | 0.243 (0.104–0.568) | 0.0011 |
|  | P for interaction |  |  |  | *0.912* |
| **NACE** | T1 (≤3.12) | 1170 | 26 | 0.284 (0.129–0.625) | 0.0018 |
|  | T2 (3.12–6.69) | 1170 | 28 | 0.437 (0.203–0.938) | 0.0337 |
|  | T3 (≥6.69) | 1170 | 25 | 0.258 (0.109–0.608) | 0.0019 |
|  | P for interaction |  |  |  | *0.988* |
| **Death or MI** | T1 (≤3.12) | 1170 | 16 | 0.235 (0.085–0.655) | 0.006 |
|  | T2 (3.12–6.69) | 1170 | 16 | 0.260 (0.095–0.708) | 0.008 |
|  | T3 (≥6.69) | 1170 | 15 | 0.040 (0.005–0.310) | 0.0021 |
|  | P for interaction |  |  |  | *0.195* |
| **Bleeding (BARC 2,3,5)** | T1 (≤3.12) | 1170 | 6 | 0.585 (0.095–3.609) | 0.564 |
|  | T2 (3.12–6.69) | 1170 | 14 | 2.350 (0.515–10.729) | 0.270 |
|  | T3 (≥6.69) | 1170 | 17 | 0.584 (0.224–1.520) | 0.270 |
|  | P for interaction |  |  |  | *0.856* |
| **CV death** | T1 (≤3.12) | 1170 | 7 | NE* | 0.985 |
|  | T2 (3.12–6.69) | 1170 | 4 | NE* | 0.999 |
|  | T3 (≥6.69) | 1170 | 8 | NE* | 0.993 |
|  | P for interaction |  |  |  | *0.999* |
| **All‑cause death** | T1 (≤3.12) | 1170 | 10 | NE* | 0.997 |
|  | T2 (3.12–6.69) | 1170 | 8 | NE* | 0.998 |
|  | T3 (≥6.69) | 1170 | 14 | NE* | 0.997 |
|  | P for interaction |  |  |  | *0.999* |
| **Stroke** | T1 (≤3.12) | 1170 | 10 | 0.345 (0.096–1.240) | 0.103 |
|  | T2 (3.12–6.69) | 1170 | 14 | 1.174 (0.321–4.295) | 0.809 |
|  | T3 (≥6.69) | 1170 | 14 | 0.473 (0.164–1.359) | 0.164 |
|  | P for interaction |  |  |  | *0.835* |
| **Stent thrombosis** | T1 (≤3.12) | 1170 | 8 | 0.234 (0.055–0.994) | 0.049 |
|  | T2 (3.12–6.69) | 1170 | 6 | 0.159 (0.029–0.887) | 0.036 |
|  | T3 (≥6.69) | 1170 | 6 | NE* | 0.997 |
|  | P for interaction |  |  |  | *0.227* |

*NE: not estimable due to zero events in the prolonged DAPT group (hazard ratio approaches zero and confidence interval extremely wide). Actual events in prolonged DAPT group: CV death (0/0/0 across tertiles), all‑cause death (0/0/0), stent thrombosis in T3 (0).
**Adjustment covariates**: age, sex, BMI, diabetes, hypertension, dyslipidemia, chronic kidney disease, prior myocardial infarction, left ventricular ejection fraction.
***P for interaction**: derived from Cox model with DAPT duration × hsCRP tertile (as continuous 1,2,3) interaction term; values >0.05 indicate no linear modification of treatment effect by hsCRP level.
